# Supplementary material for: Zinc ferrite-graphitic carbon nitride nanohybrid for photo-catalysis of the antibiotic ciprofloxacin
Source: Royal Society of Chemistry journal article supplement (doi:10.1039/d2cy01005d), 2022-01-01
Supplement: d2cy01005d1.pdf [file d2cy01005d1.pdf]

## Supplementary Information

# Zinc ferrite-graphitic carbon nitride nanohybrid for photo-catalysis of ciprofloxacin antibiotic

**Sandhya Mishra<sup>a,b</sup>, Korutla Srikanth<sup>c</sup>, T. Rajagopala Rao<sup>c</sup>, Prashant Kumar<sup>d, e\*</sup> and Sujoy Kumar Samanta<sup>a, \*</sup>**

<sup>a</sup>Department of Chemical and Biochemical Engineering, Indian Institute of Technology Patna, Bihta, Patna, Bihar, India-801106.

<sup>b</sup>Department of Chemical Engineering, Shree Dhanvantary College of Engineering and Technology, Kim (E), Surat Gujarat, India-394110.

<sup>c</sup>Department of Chemistry, Indian Institute of Technology Patna, Bihta, Patna, Bihar, India-801106.

<sup>d</sup>Department of Physics, Indian Institute of Technology Patna, Bihta, Patna, Bihar, India-801106.

<sup>e</sup>Global Innovative Centre for Advanced Nanomaterials, University of Newcastle, University Drive, Callaghan NSW 2308, Australia.

**Correspondence:** Dr. Prashant Kumar: Phone: 0421-639-160, +91-9102830953, Email: prashant.kumar@newcastle.edu.au, magmemory@gmail.com; Dr. Sujoy Kumar Samanta: Phone: +91-6115-233-173, +91-9835355046, E-mail: sksamanta@iitp.ac.in, sksamanta21@gmail.com.

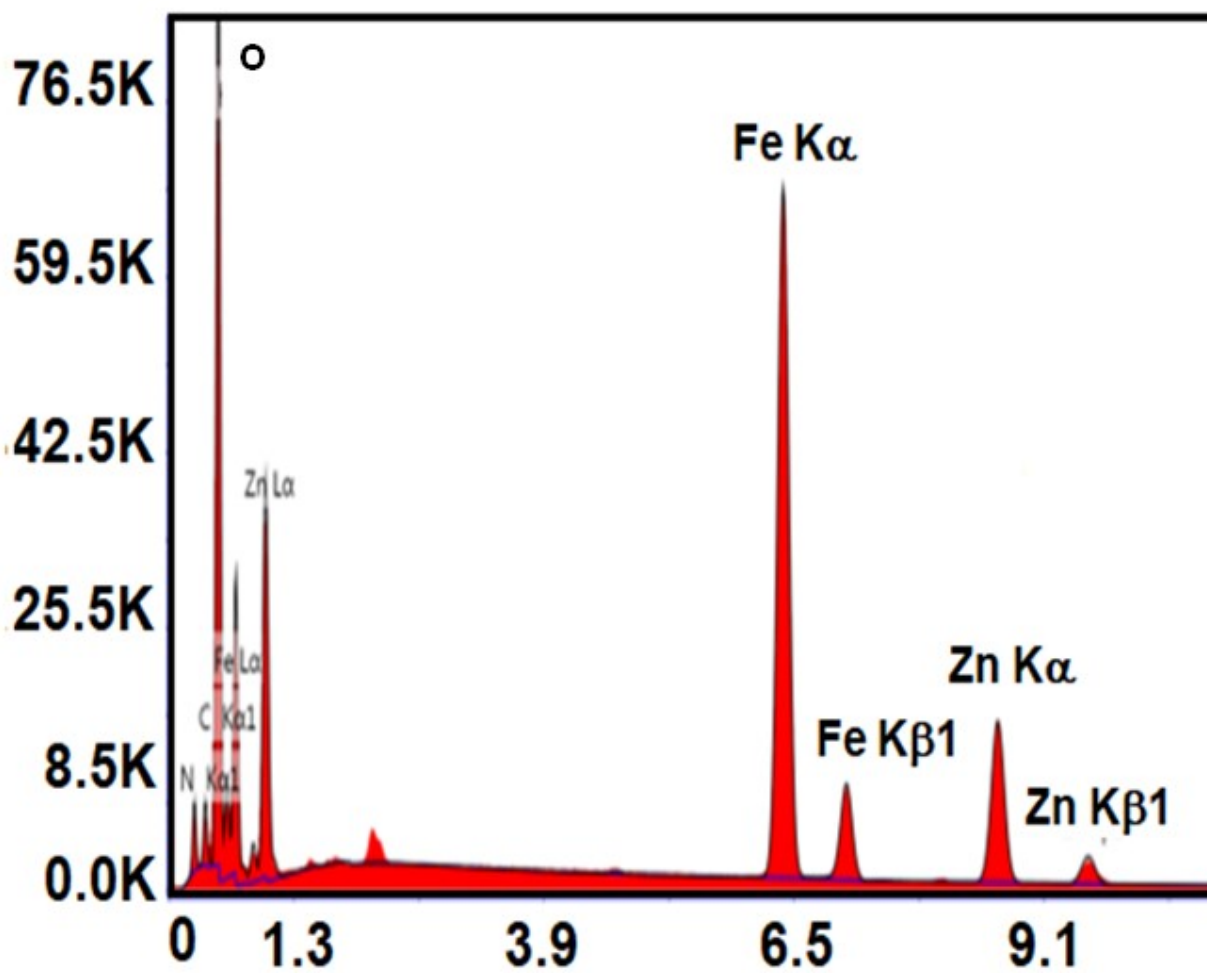

**Fig. S1** SEM- EDS of ZFCN hybrid catalyst.

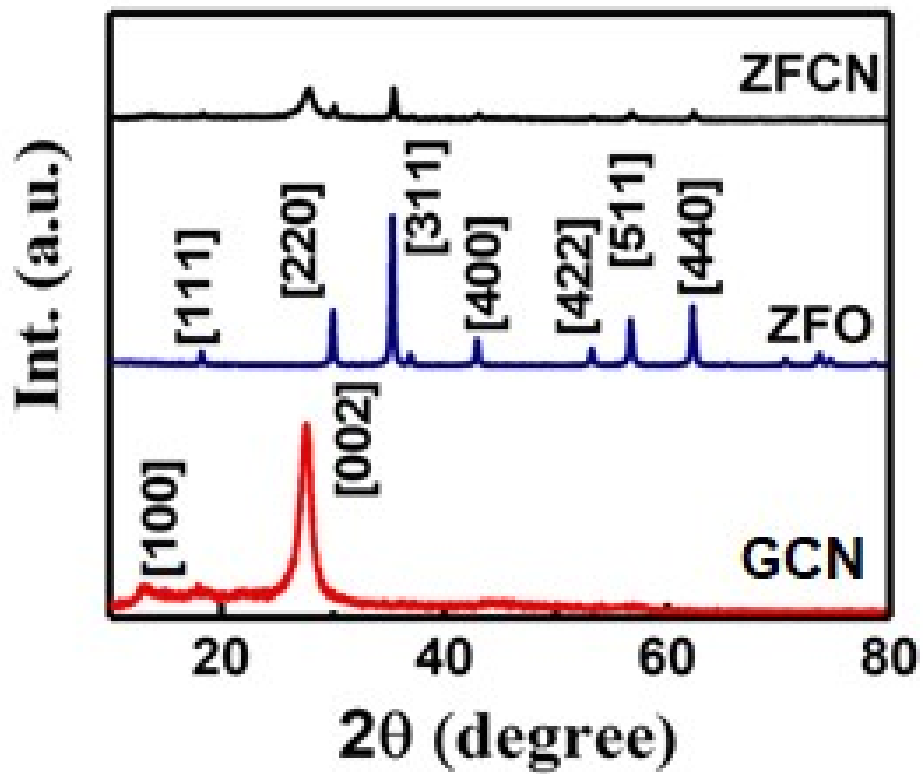

Fig. S2 XRD pattern of ZFCN (black), ZFO (blue) and GCN (red) catalyst.

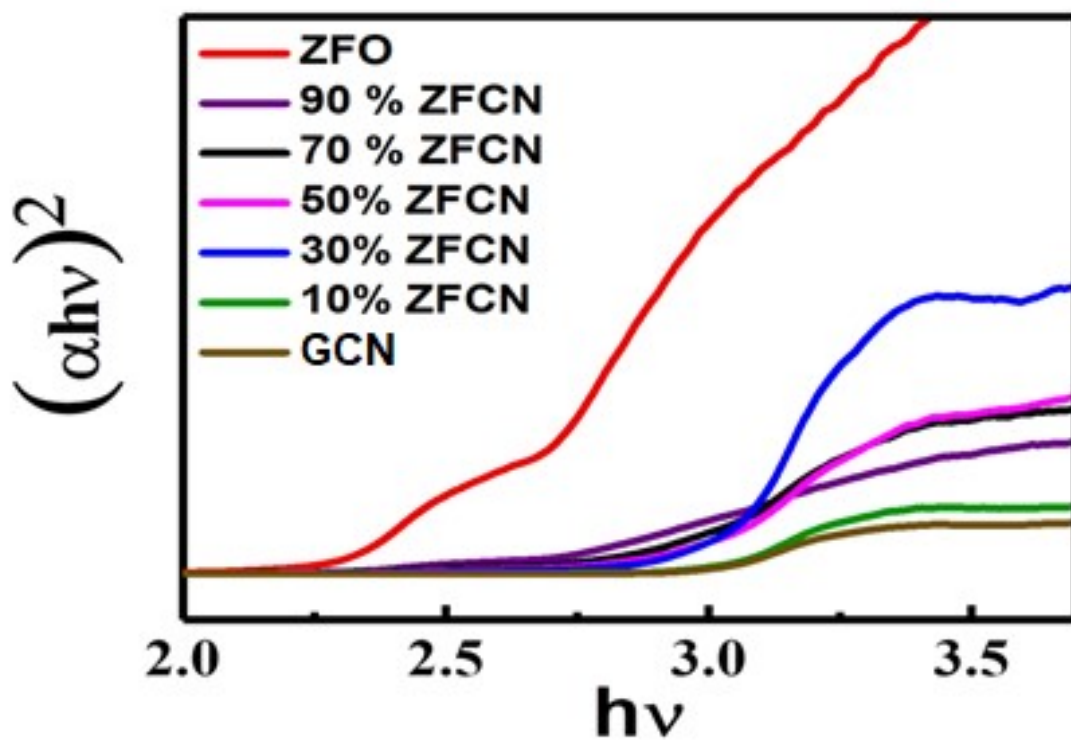

Fig. S3 DRS plot of GCN, ZFO and ZFCN as per their weight %.

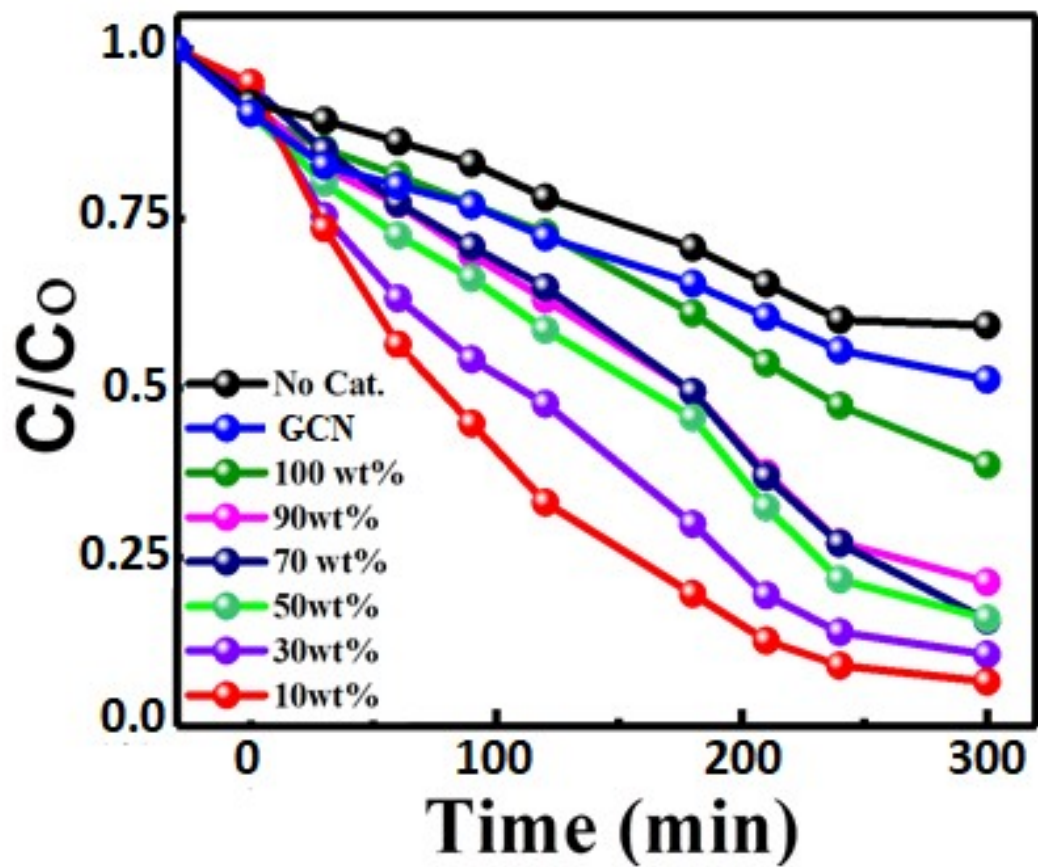

Fig. S4 Effect of weight % on the degradation of CIP.

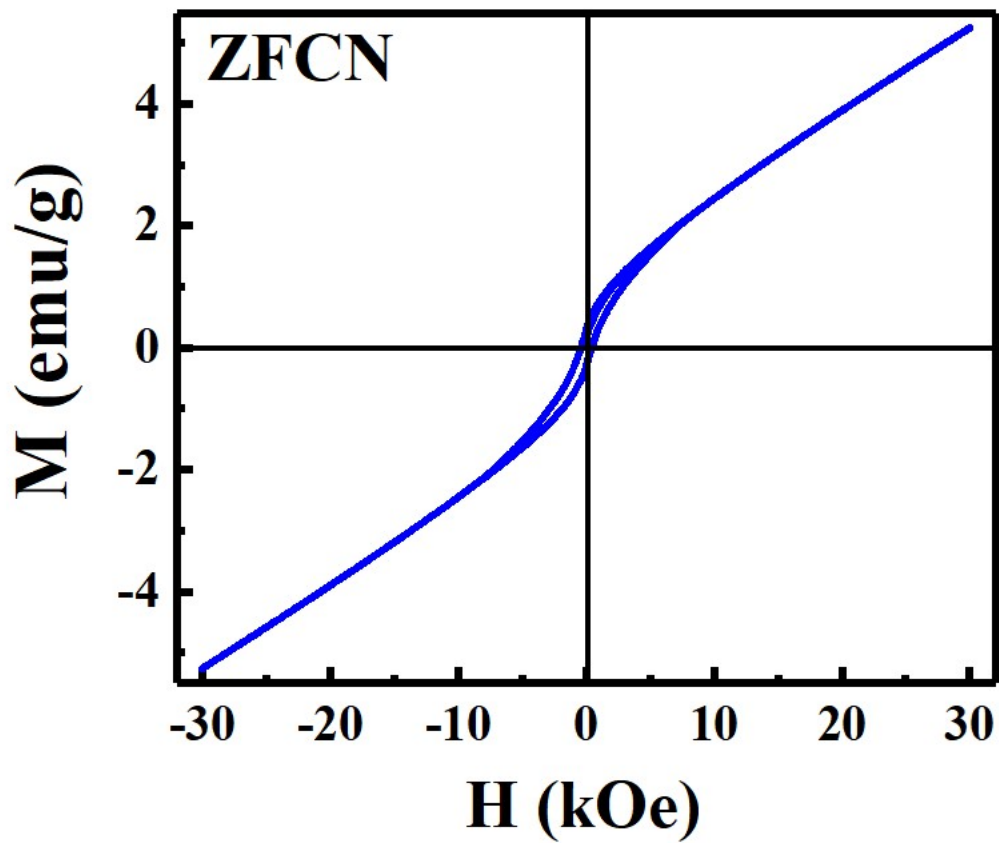

Fig. S5 M–H hysteresis loop for ZFCN sheets at room temperature.

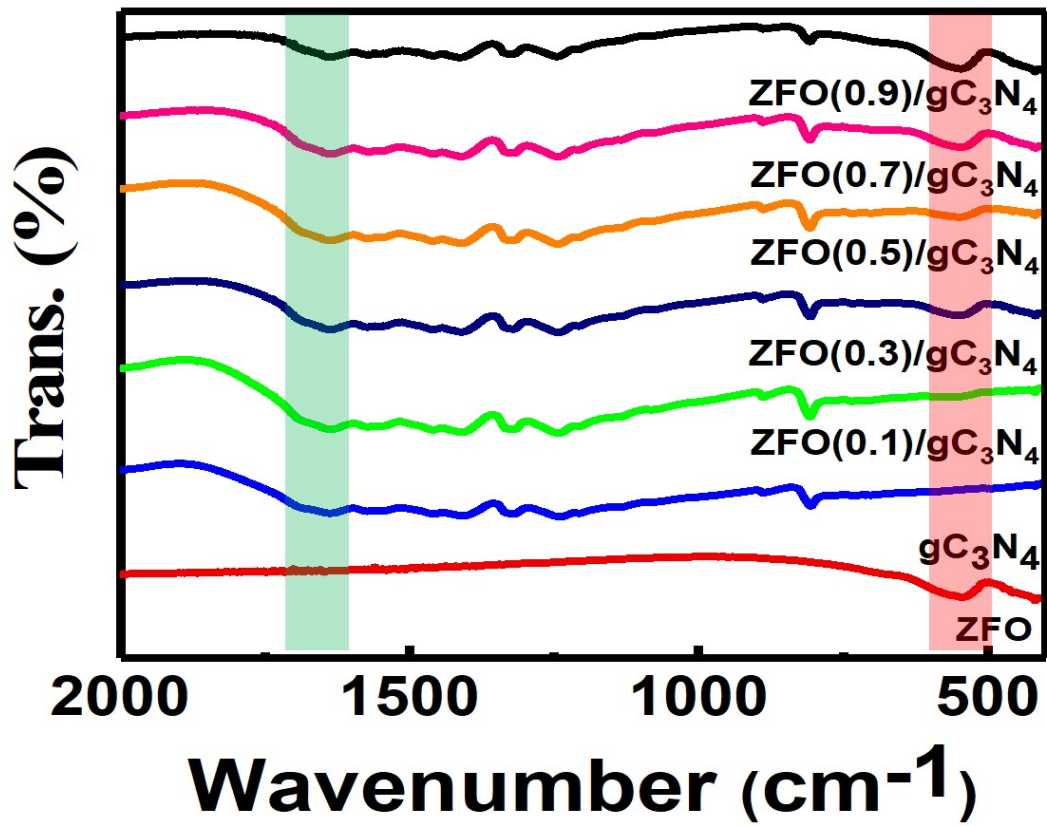

Fig. S6 FTIR spectrum of ZFCN according to their weight % ratio.

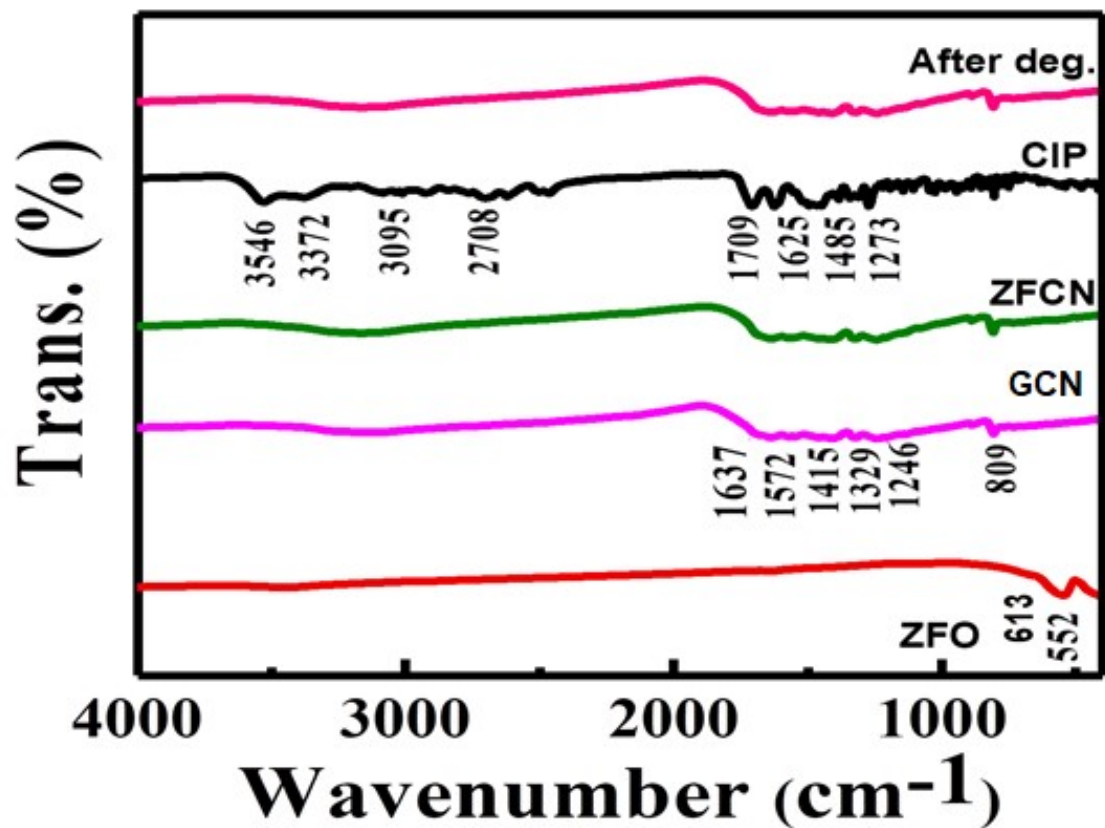

**Fig. S7** FTIR spectrum of ZFO, GCN, ZFCN, CIP and after degradation of the catalyst.



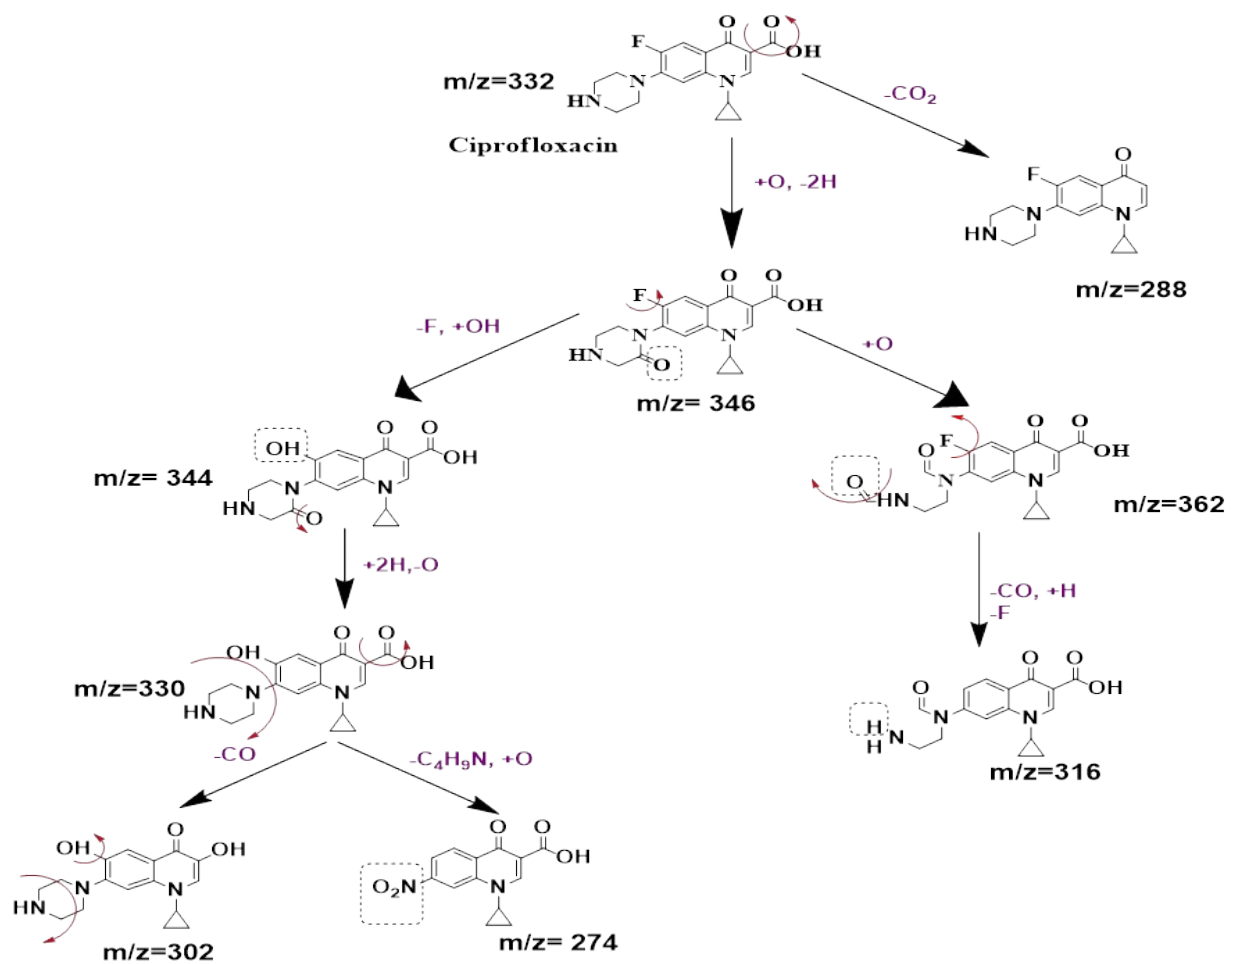

**Fig. S8** Proposed pathway of CIP degradation.

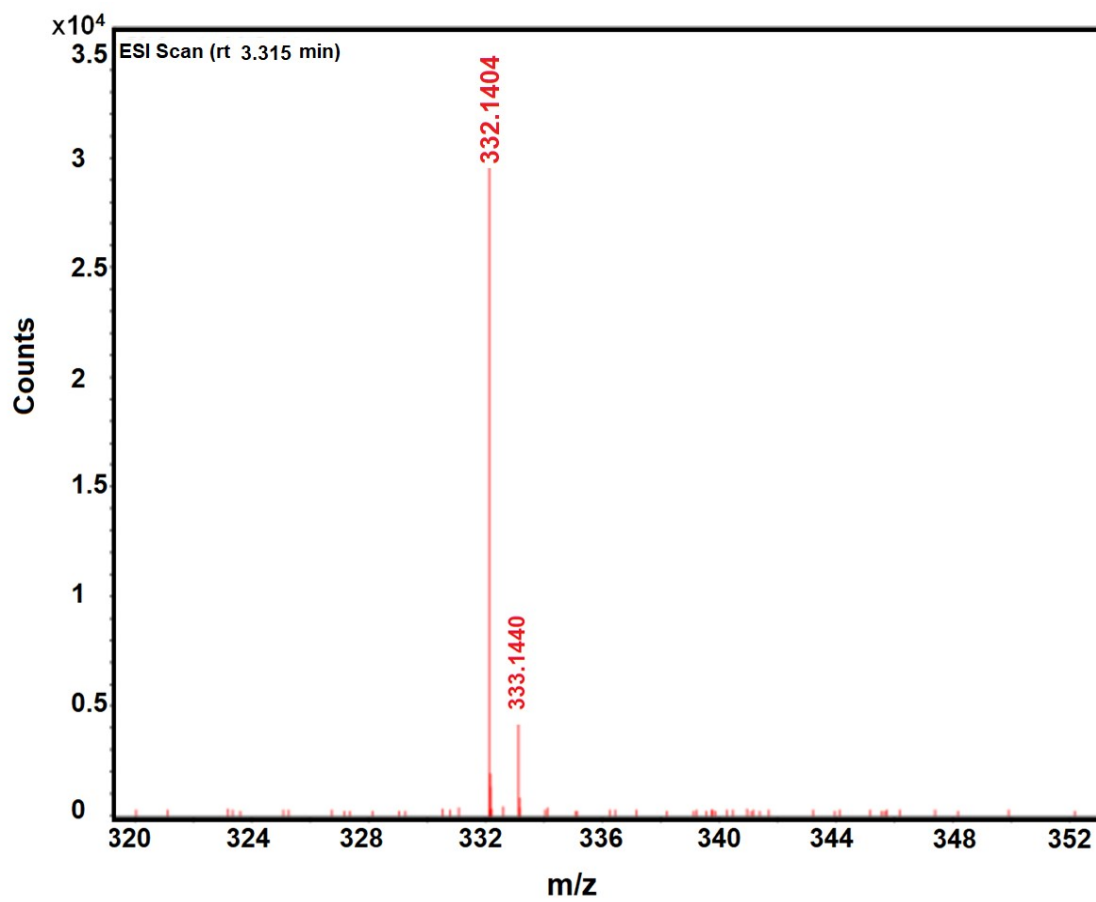

Fig. S9 (a)

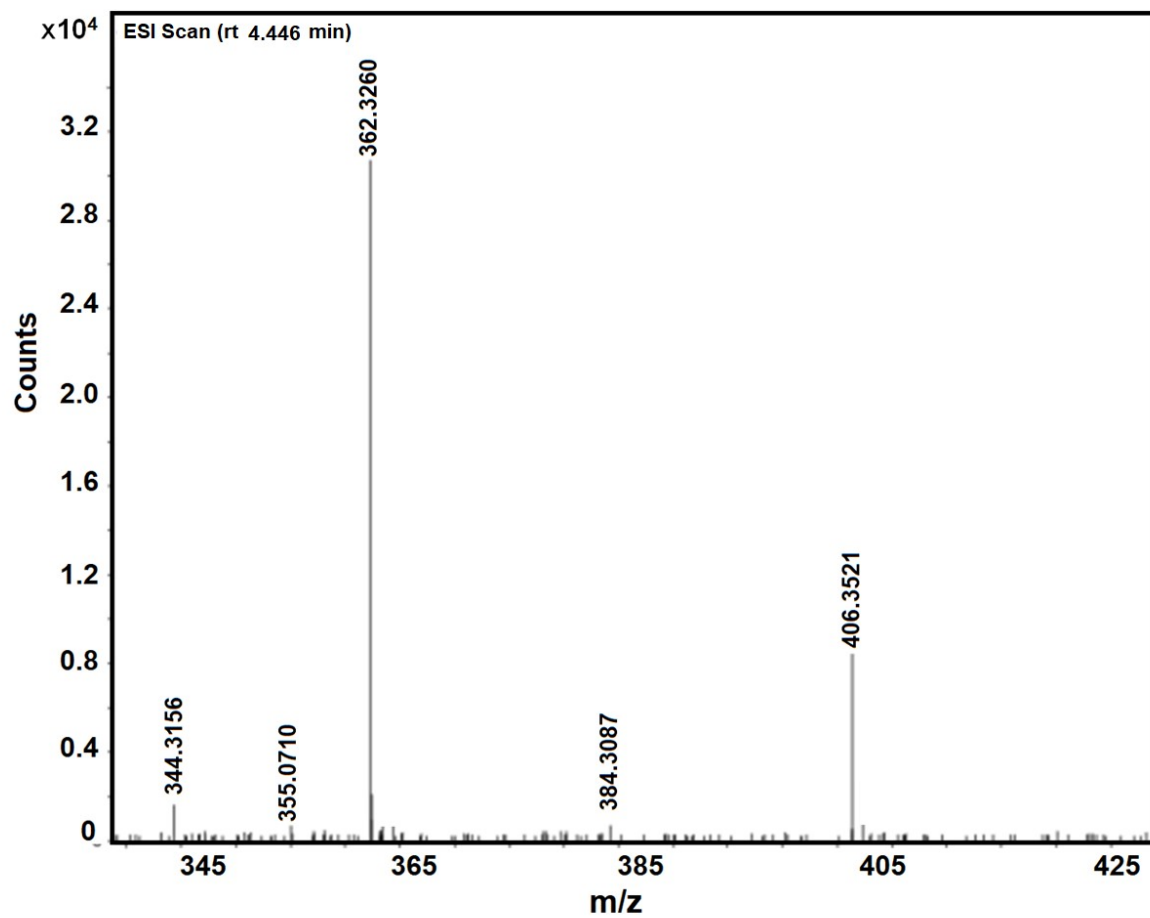

Fig. S9 (b)

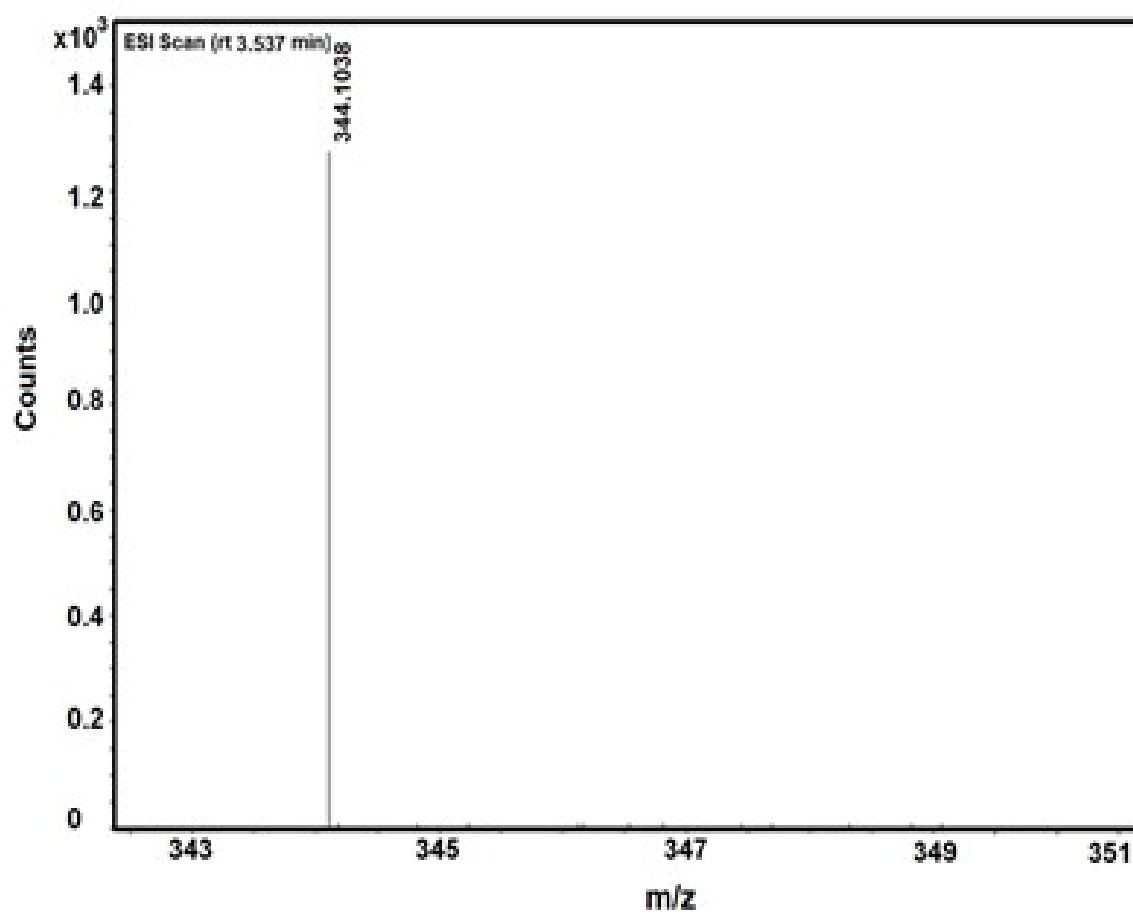

Fig. S9 (c)

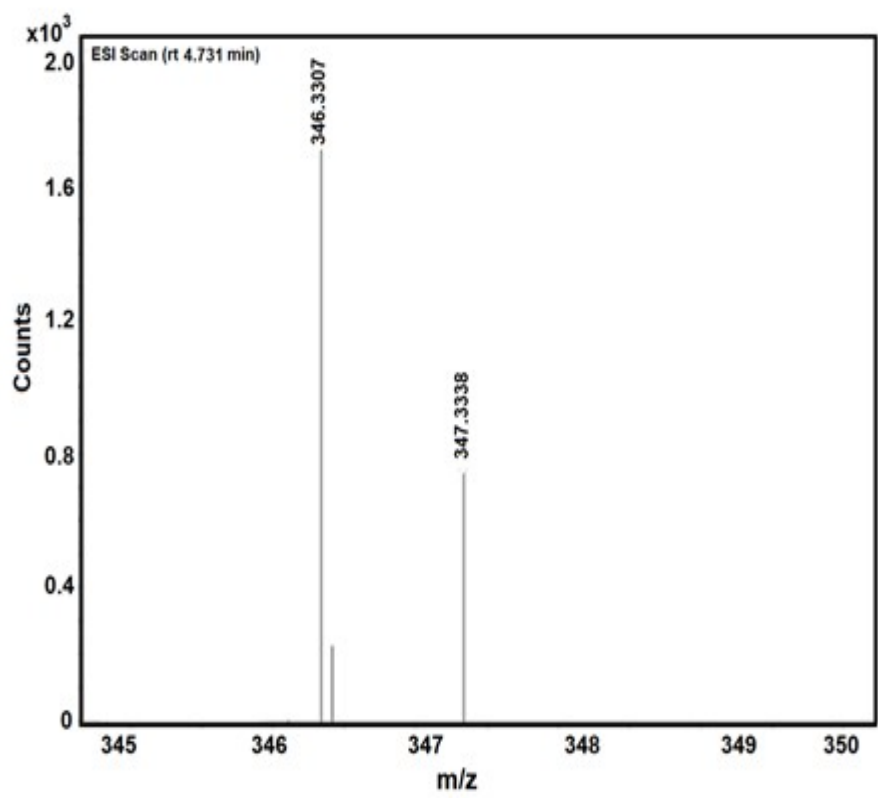

Fig. S9 (d)

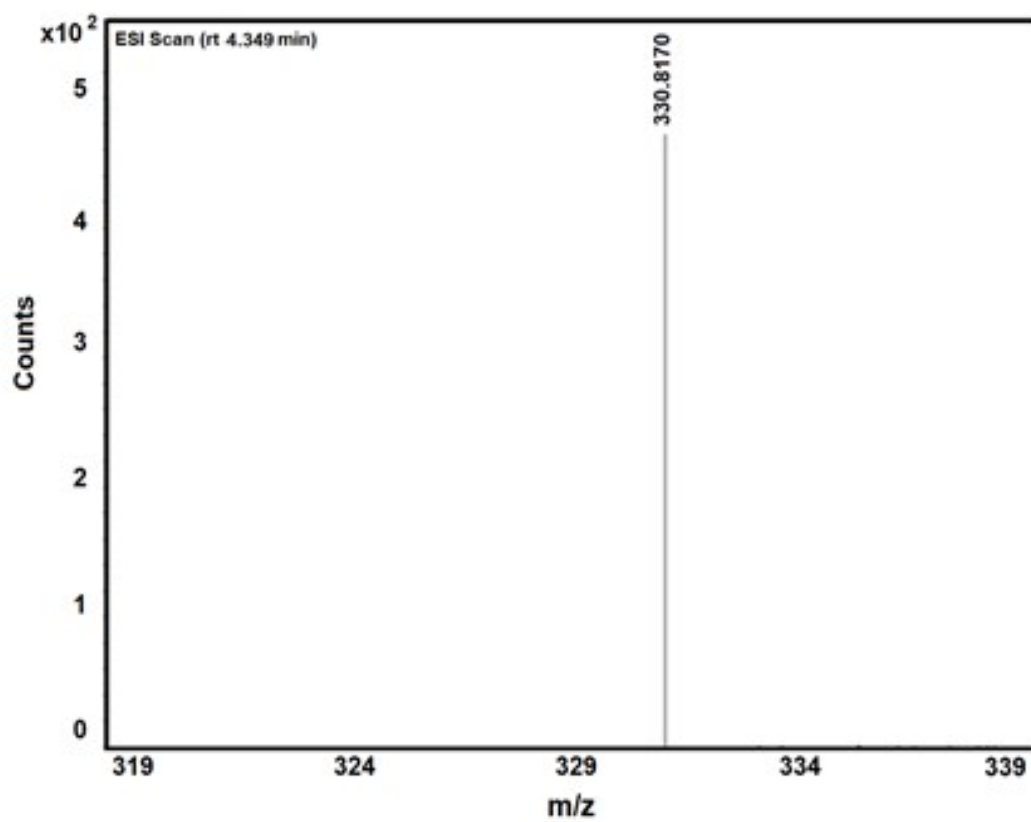

Fig. S9 (e)

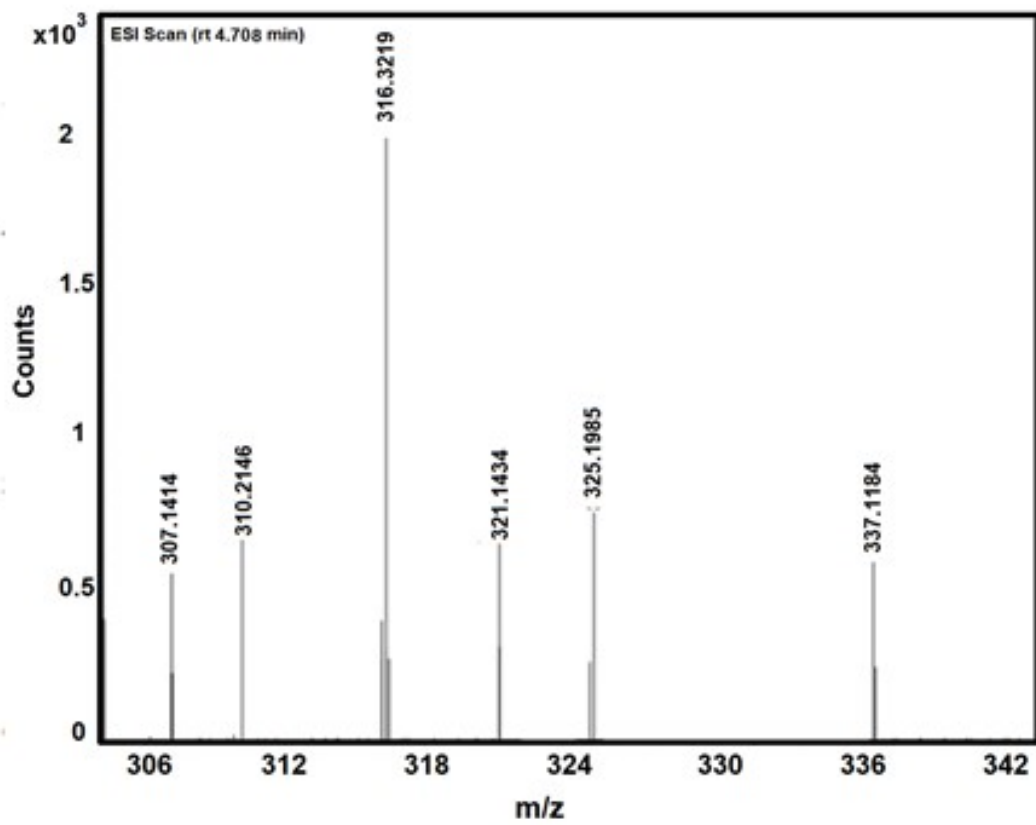

Fig. S9 (f)

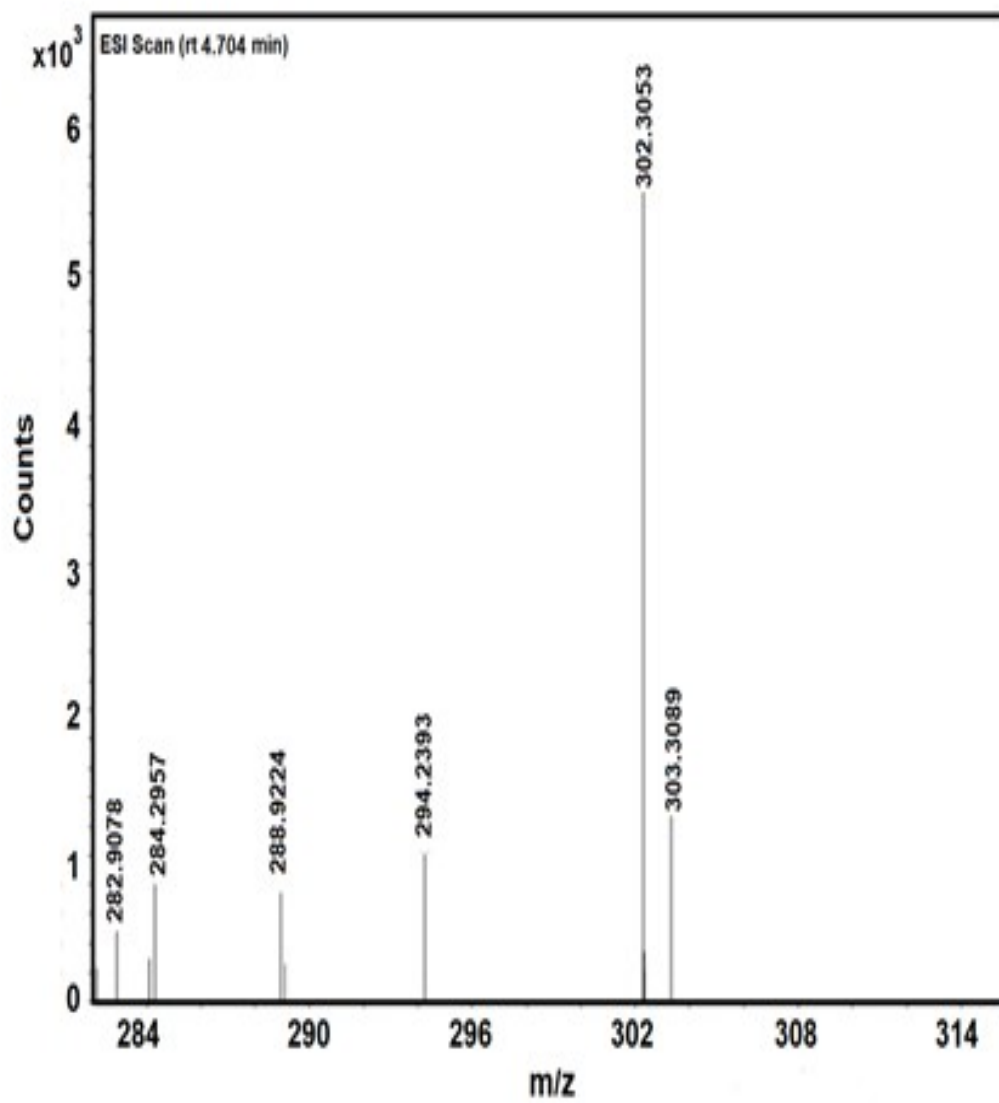

Fig. S9 (g)



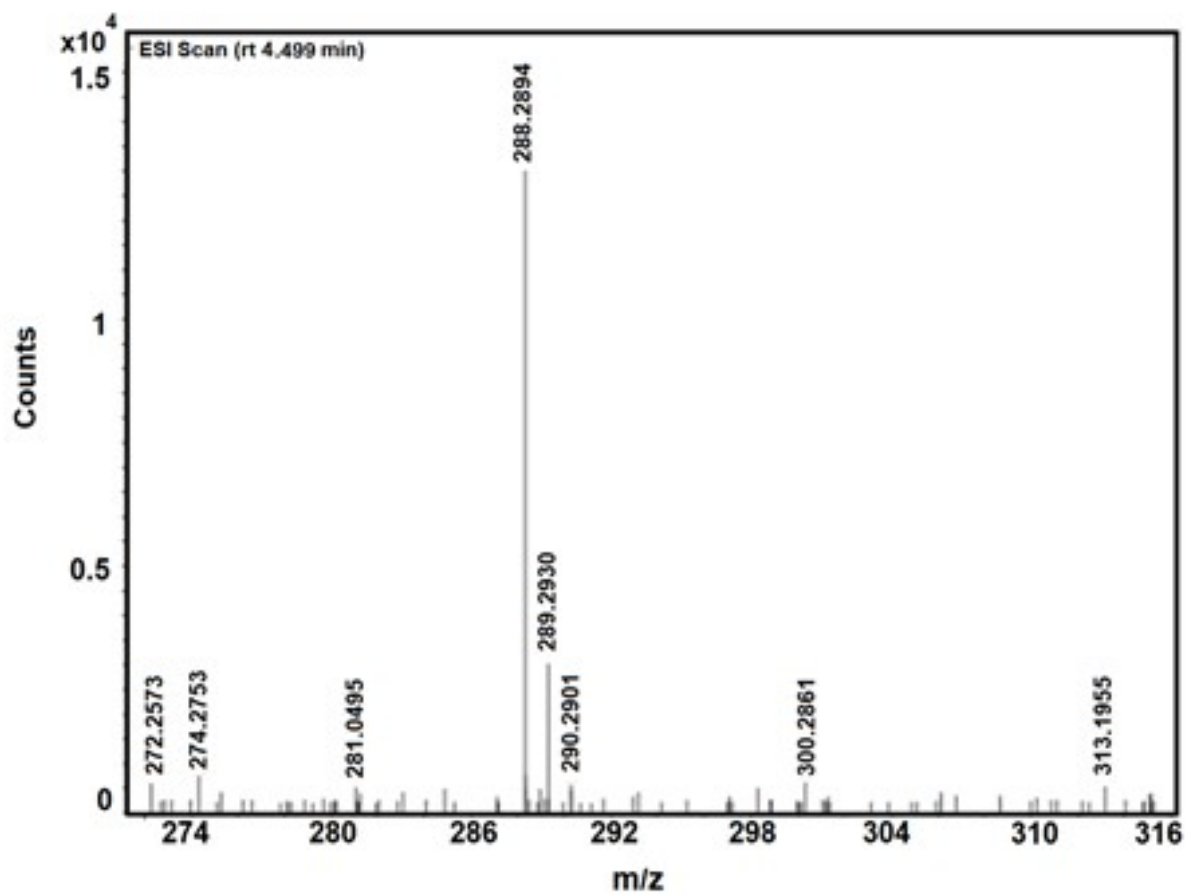

Fig. S9 (h)

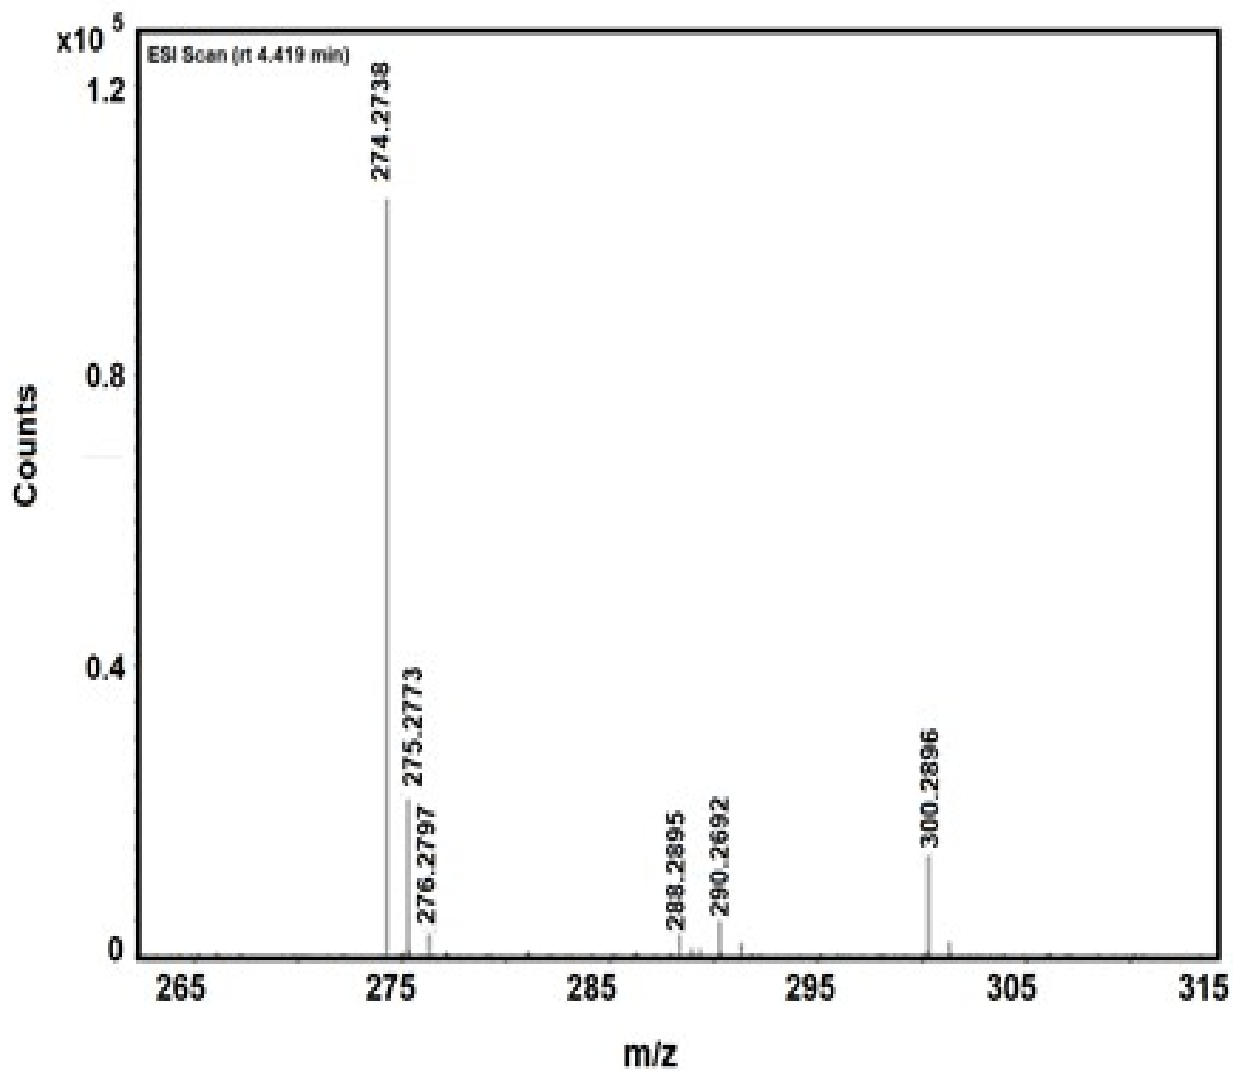

**Fig. S9 (i)**

**Fig. S9** Mass spectra for intermediates are shown for (a-i) at various time points during the degradation of ciprofloxacin.

**Table S1- The possible intermediates of CIP degradation in the ZFCN/UV system**

| Number | Formula               | RT (min) | m/z | Proposed structure                                                                    |
|--------|-----------------------|----------|-----|---------------------------------------------------------------------------------------|
| CIP    | $C_{17}H_{18}FN_3O_3$ | 3.31     | 332 | 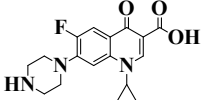   |
| P1     | $C_{17}H_{16}FN_3O_5$ | 4.46     | 362 |    |
| P2     | $C_{17}H_{16}FN_3O_4$ | 4.73     | 346 |    |
| P3     | $C_{17}H_{17}N_3O_5$  | 3.57     | 344 |    |
| P4     | $C_{16}H_{17}N_3O_4$  | 4.70     | 316 |    |
| P5     | $C_{17}H_{19}N_3O_4$  | 4.34     | 330 |   |
| P6     | $C_{16}H_{19}N_3O_3$  | 4.02     | 302 |  |
| P7     | $C_{13}H_{10}N_2O_5$  | 4.41     | 274 |  |
| P8     | $C_{16}H_{18}FN_3O$   | 4.49     | 288 |  |

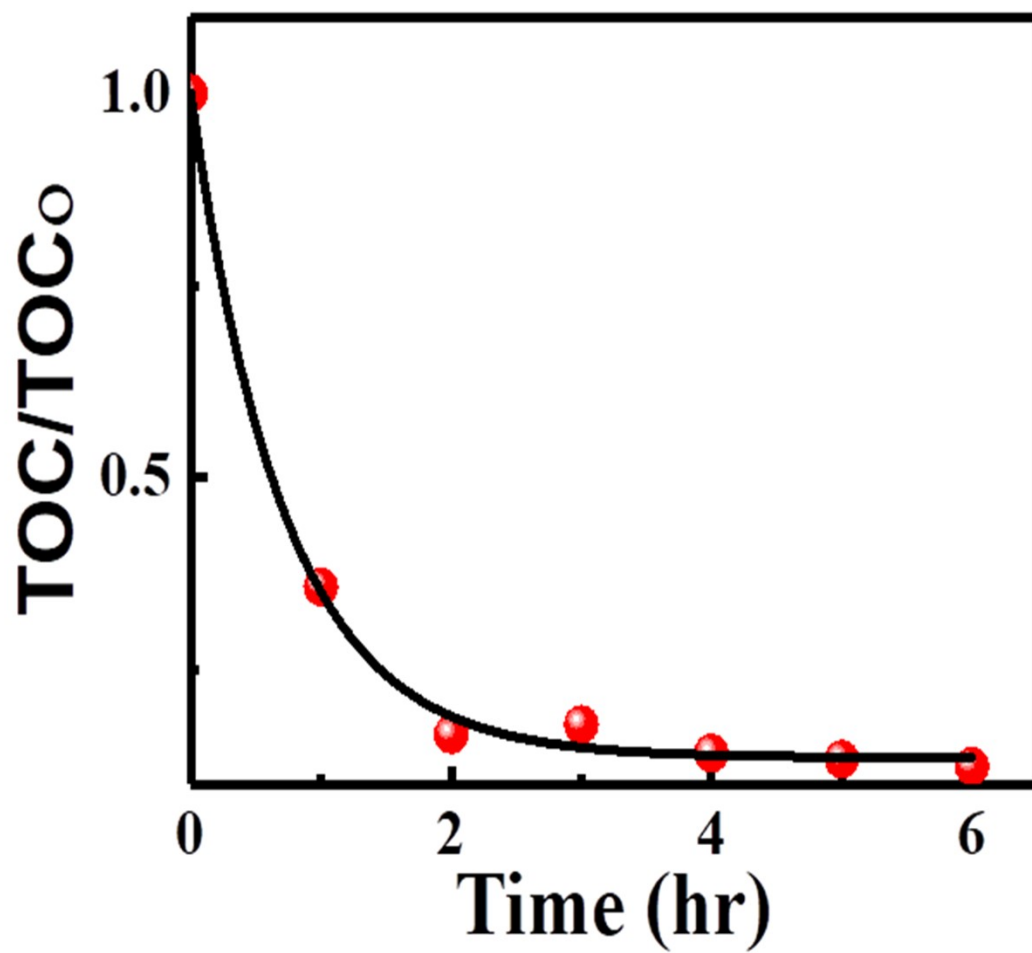

Fig. S10 Kinetic fitting of TOC of CIP degradation

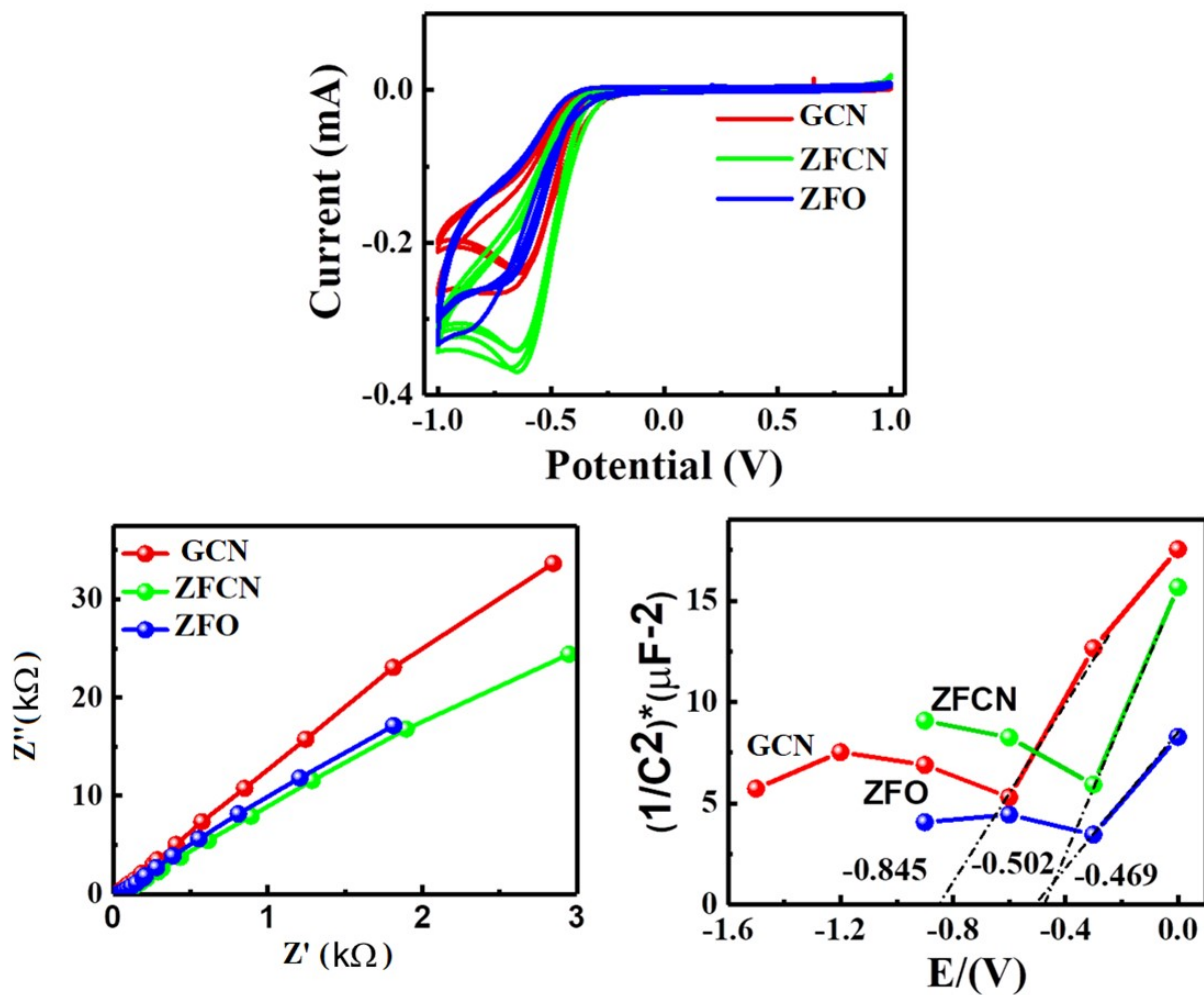

**Fig. S11** Electrochemical study of GCN, ZFCN and ZFO (a) cyclic voltammety, (b) Nyquist plot and (c) Mott-schottky plot.

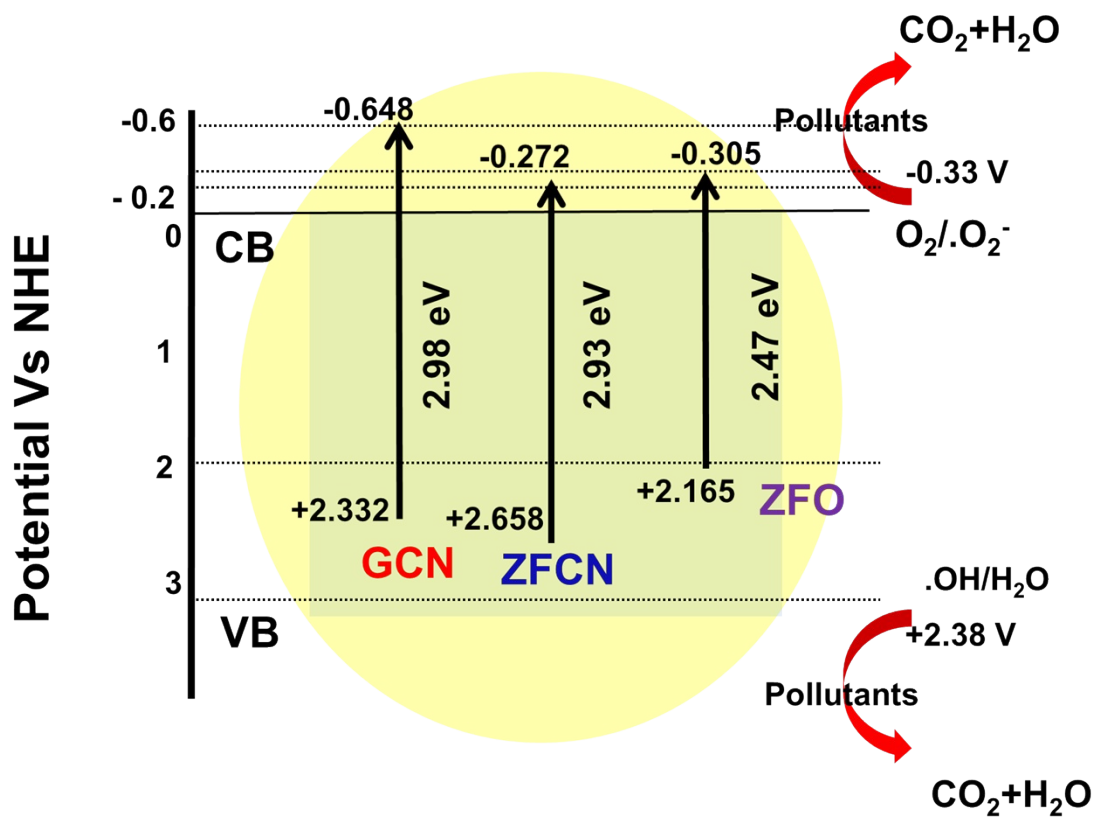

Fig. S12 Band structure of GCN, ZFCN and ZFO.

**Table S2** BET surface area of the catalyst.

| <b>Samples</b> | <b>BET Surface Area (m<sup>2</sup> g<sup>-1</sup>)</b> |
|----------------|--------------------------------------------------------|
| GCN            | 24.80                                                  |
| ZFO            | 6.06                                                   |
| ZFCN           | 12.90                                                  |

**Table S3.** Comparisons between the present method's degradation efficiency and that of other methods for the degradation of the CIP that have been published in the literature.

| Method/Catalyst                    | pH       | Initial Concentration | Degradation efficiency (%) | References           |
|------------------------------------|----------|-----------------------|----------------------------|----------------------|
| Ozonation                          | 5        | 20 mg/L               | 90                         | Hassani et al., 2016 |
| Ionization Radiation               | 4.8      | 10 mg/L               | 70                         | Tegze et al., 2019   |
| Photocatalysis (TiO <sub>2</sub> ) | 5.6      | 10 mg/L               | 89.62                      | Verma et al. 2017    |
| Solar Light (TiO <sub>2</sub> /Ti) | 6.3      | 10 mg/L               | 88.86                      | Sayed et al., 2018   |
| Ferrate/<br>Persulfate             | 4        | 30 mg/L               | 91.5                       | Li et al., 2019      |
| Electro-chemical                   | 4.5      | 20 mg/L               | 84                         | Matzek et al., 2018  |
| Membrane                           | 8.63     | 50 mg/L               | 90                         | Vinu et al., 2010    |
| <b>Photocatalysis</b>              | <b>5</b> | <b>10 mg/L</b>        | <b>95</b>                  | <b>Present Work</b>  |



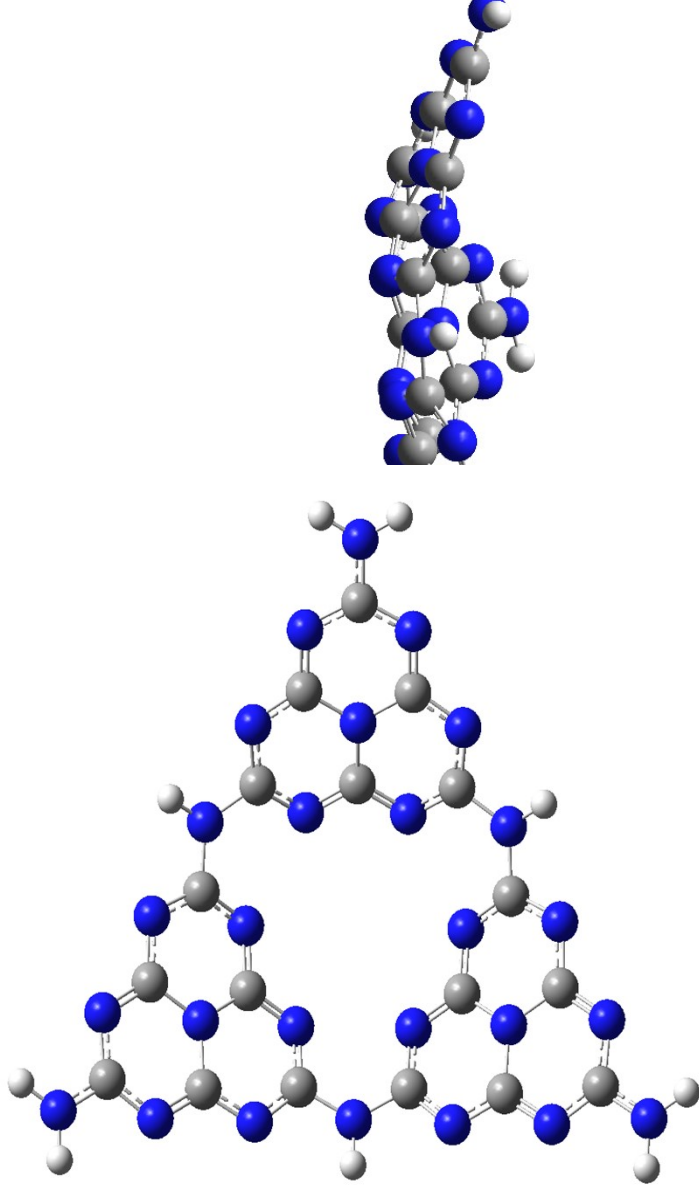

**Fig. S13** Optimized structure of GCN sheet (Left: side view, Right: front view).

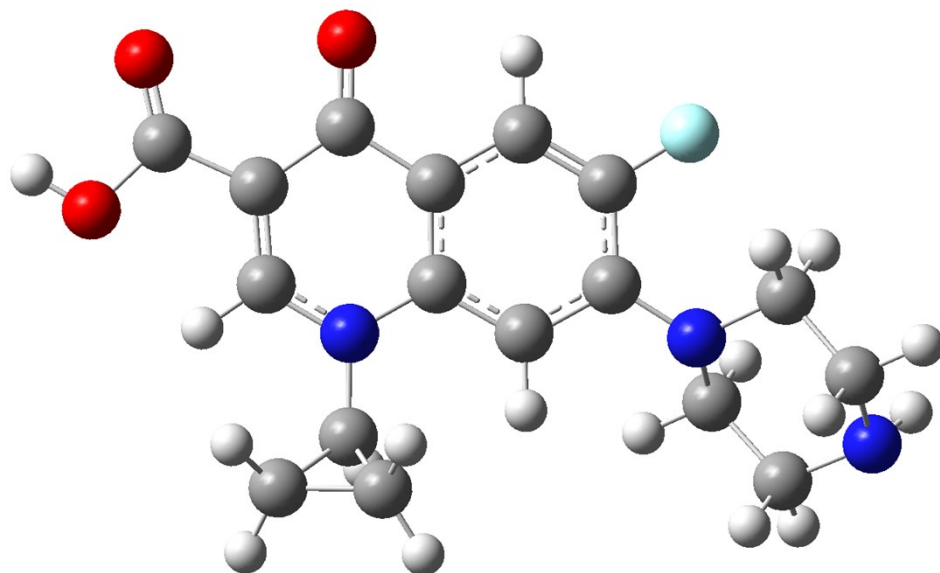

**Fig. S14** Optimized structure of ciprofloxacin molecule.
